# Supplementary material for: Brain-inspired speech segmentation for automatic speech recognition using the speech envelope as a temporal reference
Source: PubMed Central journal article supplement (PMC5120313; doi:10.1038/srep37647), 2016-11-23
Supplement: srep37647-s1.pdf [file srep37647-s1.pdf]

1 **Brain-inspired speech segmentation for automatic speech**  
2 **recognition using the speech envelope as a temporal**  
3 **reference**

4  
5  
6  
7 **Byeongwook Lee and Kwang-Hyun Cho\***

8  
9  
10 Laboratory for Systems Biology and Bio-inspired Engineering, Department of Bio and Brain  
11 Engineering, Korea Advanced Institute of Science and Technology (KAIST),  
12 Daejeon, 34141, Republic of Korea.

13  
14  
15  
16 **Supplementary Information**  
17

18  
19  
20  
21  
22 \*Corresponding author. E-mail: [ckh@kaist.ac.kr](mailto:ckh@kaist.ac.kr), Phone: +82-42-350-4325, Fax: +82-42-350-4310,

23 Web: <http://sbie.kaist.ac.kr/>

## 24 **I. Supplementary Notes**

### 25 **Dependence of the algorithm on the number of division**

26 We chose quadrant division for theta and gamma oscillations because the frame size obtained  
27 by this division is generally consistent with the optimal size that represents the spectral  
28 characteristics spread over the speech signals. The frame size obtained by dividing theta band  
29 (4~10 Hz) oscillations or low-gamma band (25~35 Hz) oscillations into quadrants ranges  
30 from 25 ms to 60 ms or 5 ms to 10 ms, respectively. These ranges are consistent with the  
31 ranges from previous speech recognition studies that were considered to be optimal for  
32 achieving a high recognition performance<sup>1</sup>. The use of two divisions produces a frame size  
33 that ranges from 50 ms to 120 ms (for theta band oscillation) or 10 ms to 20 ms (for low-  
34 gamma band oscillation), which is relatively large and can smear the temporal change of  
35 spectrum within the phoneme and between two phoneme boundaries. The use of eight  
36 divisions or denser divisions produces a relatively short frame size that ranges from 12.5 ms  
37 to 30 ms (for theta band oscillation) and 2.5 ms and 5 ms (for low-gamma band oscillation).  
38 This division can achieve excellent recognition performance for clean speech. However, this  
39 short frame size can cause an accumulation of unnecessarily overlapping features and  
40 insertion errors as the noise level increases<sup>2</sup>. Previous studies indicated that the recognition  
41 performance is limited when the density of speech segmentation exceeds a certain level,  
42 which indicates that excessive speech segmentation is unnecessary<sup>3</sup>. Thus, we chose a  
43 quadrant division of theta and low-gamma oscillation as an optimal division size to capture  
44 various temporal changes of spectrum within speech signals.

45

## 46 **Algorithm's recognition performance under different boundary condition**

47 We used the boundary separation conditions ( $[-180^\circ, -90^\circ]$ ,  $[-90^\circ, 0^\circ]$ ,  $[0^\circ, 90^\circ]$ ,  $[90^\circ, 180^\circ]$ )  
48 because these conditions are prevalent in neuroscience studies that investigated the role of  
49 phase information in neuronal oscillations<sup>4-7</sup>. We have explored how the algorithm performs  
50 during phase re-parametrization of the boundaries. In this experiment, we considered equally  
51 spaced quadrant boundaries and shifted them clockwise by 20 degrees to create five different  
52 boundary conditions: ( $[-180^\circ, -90^\circ]$ ,  $[-90^\circ, 0^\circ]$ ,  $[0^\circ, 90^\circ]$ ,  $[90^\circ, 180^\circ]$ ), ( $[-160^\circ, -70^\circ]$ ,  $[-70^\circ,$   
53  $20^\circ]$ ,  $[20^\circ, 110^\circ]$ ,  $[110^\circ, -160^\circ]$ ), ( $[-140^\circ, -50^\circ]$ ,  $[-50^\circ, 40^\circ]$ ,  $[40^\circ, 130^\circ]$ ,  $[130^\circ, -140^\circ]$ ), ( $[-$   
54  $120^\circ, -30^\circ]$ ,  $[-30^\circ, 60^\circ]$ ,  $[60^\circ, 150^\circ]$ ,  $[150^\circ, -120^\circ]$ ), ( $[-100^\circ, -10^\circ]$ ,  $[-10^\circ, 80^\circ]$ ,  $[80^\circ, 170^\circ]$ ,  
55  $[170^\circ, -100^\circ]$ ). We tested the algorithm performance under various noise levels. The result  
56 showed no significant differences between boundary conditions (Fig. S1). This result  
57 indicates that recognition performance is more related to the frequency of oscillatory  
58 reference and the thresholding parameter for detecting consonant regions.

59

## 60 **Algorithm's recognition performance in the absence of a thresholding**

61 We tested the algorithm performance in the absence of a threshold for various noise levels.  
62 We compared the recognition performance among the FFSR, nested oscillation (NVFS; theta-  
63 low gamma nested), and single frequency band oscillations (once with theta band oscillation  
64 and once with low-gamma band oscillation, which were employed as a primary oscillatory  
65 reference and a secondary oscillatory reference, respectively, in our study). We plotted the  
66 recognition accuracy (Fig. S2(a)) and the number of frames that were employed to segment  
67 consonant and vowel regions by each segmentation scheme (Fig. S2(b)). When speech is not  
68 strongly corrupted by noise, nested oscillation and gamma-band oscillation provides similar

69 recognition performance. This high performance can be explained by the relatively large  
70 number of frames that were employed by these two segmentation schemes to capture  
71 consonant and transition regions. As the noise increases, however, the performance of  
72 gamma-band oscillation significantly decreases compared with nested oscillation. This  
73 finding is attributed to the unnecessary number of frames that capture the vowel region,  
74 which eventually add redundant (noisy) information and cause insertion errors in the system,  
75 which reduces the recognition performance <sup>2</sup>. Considering the computational cost of speech  
76 recognition, gamma-band oscillation employs a larger number of frames than nested  
77 oscillation, which is computationally inefficient regarding their recognition performance. The  
78 theta-band oscillation indicated poor recognition performance because an insufficient number  
79 of frames is applied to segment consonant and transition regions, which creates difficulties in  
80 distinguishing different consonant types. As a result, a thresholding procedure is necessary to  
81 achieve high recognition accuracy and computational efficiency.

82  
83  
84  
85  
86  
87  
88  
89  
90  
91  
92  
93

94 **II. Supplementary figures**

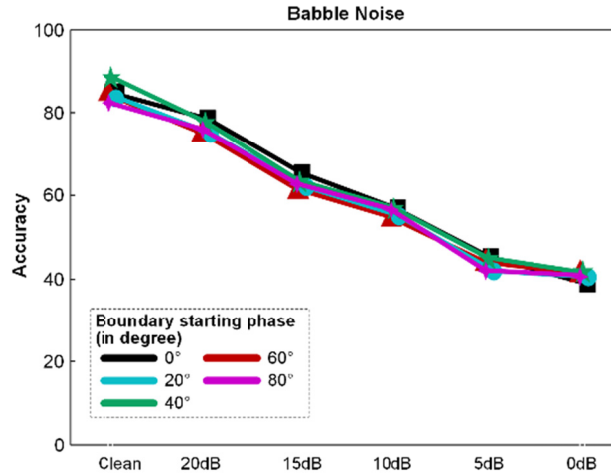

95  
96  
97  
98  
99

**Supplementary Figure S1. Recognition performance between different boundary condition.**

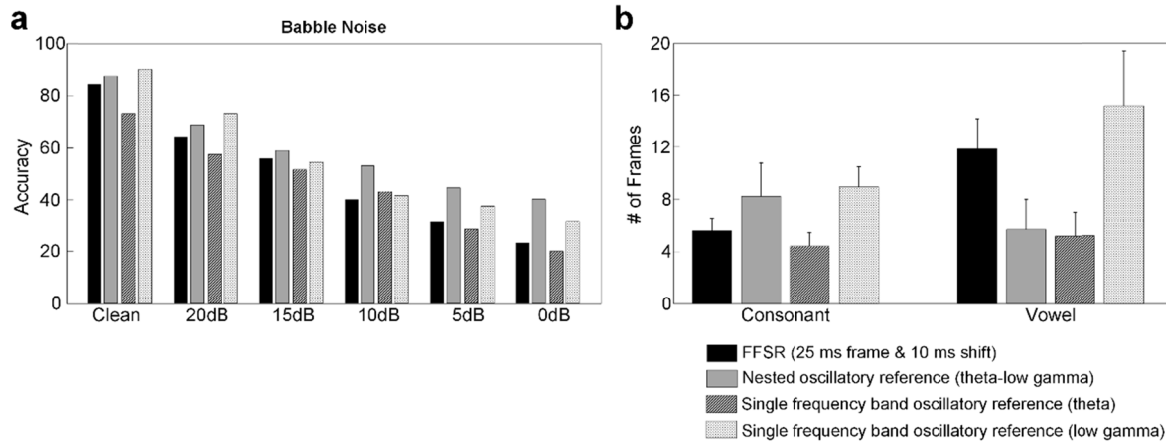

100  
101  
102  
103  
104

**Supplementary Figure S2. Recognition performance among different thresholding schemes (a) Recognition results of four different segmentation schemes are evaluated. (b) Number of frames used to segment and consonant and vowel region in each segmentation scheme.**

**a**

/ka/: Stop Consonant+Vowel

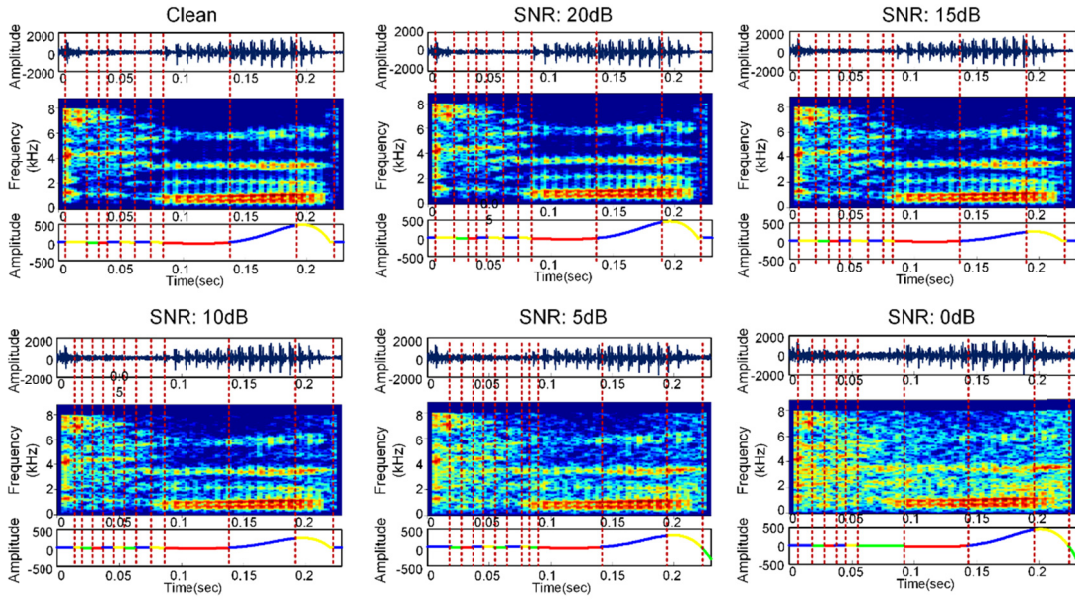

105

**b**

/sa/: Fricative consonant+Vowel

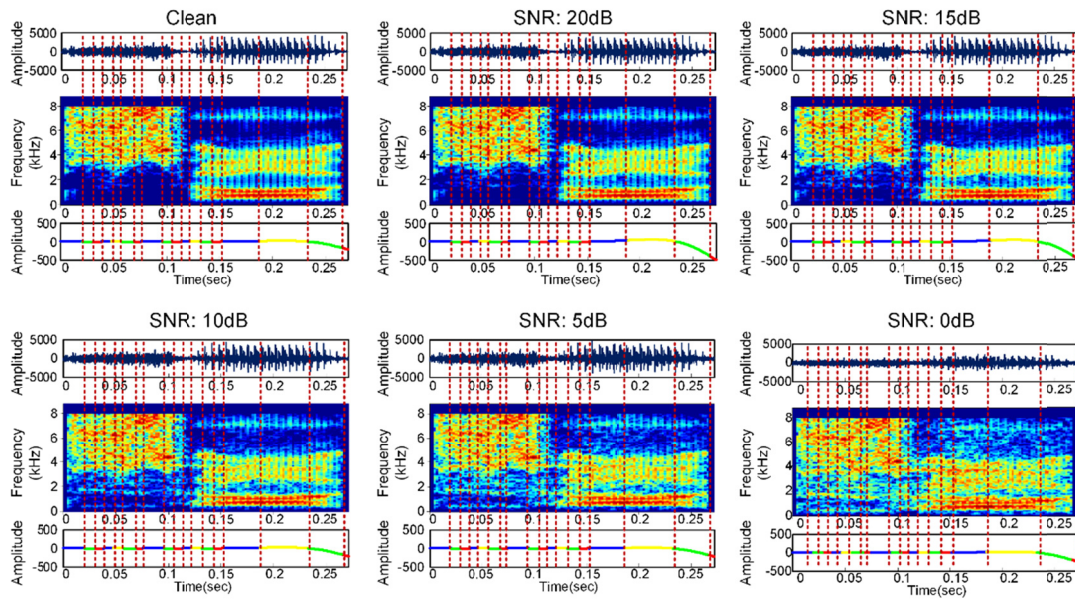

106

c

/ma/: Nasal consonant+Vowel

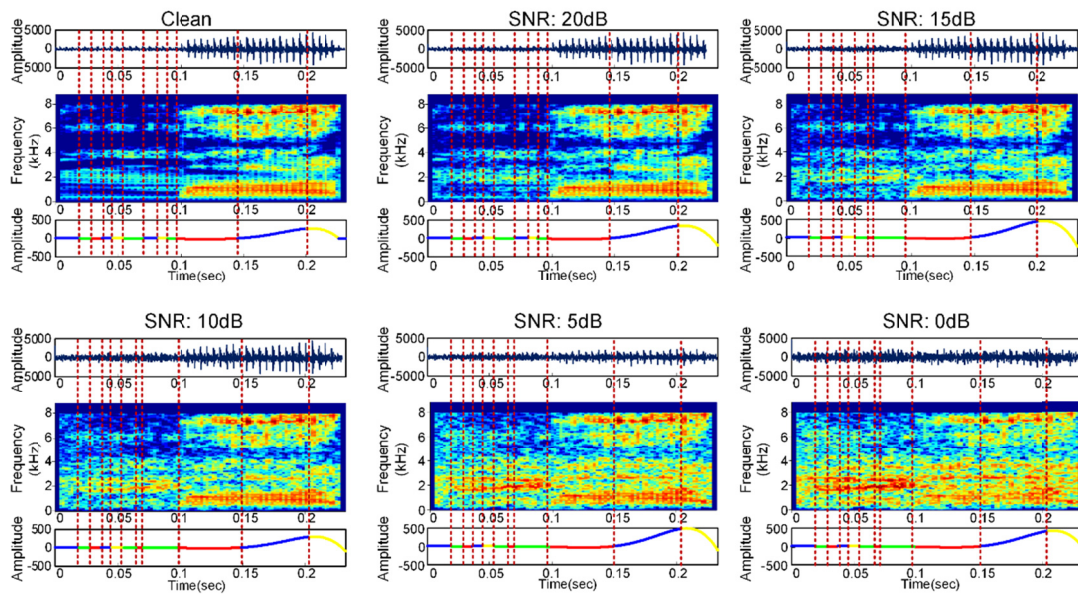

107

108 **Supplementary Figure S3. Noise robustness of NVFS based speech segmentation on**

109 **various SNR levels.** NVFS scheme is applied to various syllable unit speech, which are

110 composed of different consonant type: (a) stop consonant, (b) fricative consonant, and (c)

111 nasal consonant. For all syllable samples, frame boundaries are decided by modulation rate of

112 its envelope, which is short for fast modulation rate region (consonant and transition region)

113 and relatively long for slow modulation rate region (vowel region). Frame boundaries are

114 kept nearly constant over all SNR levels, showing robustness of NVFS based speech

115 segmentation.

116

117

118

119

120

121

122

### 123 **III. Supplementary References**

- 124 1 Deller Jr, J. R., Proakis, J. G. & Hansen, J. H. *Discrete time processing of speech*  
125 *signals*. (Prentice Hall PTR, 1993).
- 126 2 Le Cerf, P. & Van Compernelle, D. A new variable frame analysis method for speech  
127 recognition. *Signal Processing Letters, IEEE* **1**, 185-187 (1994).
- 128 3 Loizou, P. C. *Speech enhancement: theory and practice*. (CRC press, 2013).
- 129 4 Kayser, C., Montemurro, M. A., Logothetis, N. K. & Panzeri, S. Spike-phase coding  
130 boosts and stabilizes information carried by spatial and temporal spike patterns.  
131 *Neuron* **61**, 597-608 (2009).
- 132 5 Panzeri, S., Brunel, N., Logothetis, N. K. & Kayser, C. Sensory neural codes using  
133 multiplexed temporal scales. *Trends in neurosciences* **33**, 111-120 (2010).
- 134 6 Cogan, G. B. & Poeppel, D. A mutual information analysis of neural coding of speech  
135 by low-frequency MEG phase information. *Journal of neurophysiology* **106**, 554-563  
136 (2011).
- 137 7 Kayser, C., Ince, R. A. & Panzeri, S. Analysis of slow (theta) oscillations as a  
138 potential temporal reference frame for information coding in sensory cortices. *PLoS*  
139 *Comput Biol* **8**, e1002717 (2012).
- 140
